# Supplementary material for: The new ceRNA crosstalk between mRNAs and miRNAs in intervertebral disc degeneration
Source: Front Cell Dev Biol. 2022 Dec 2;10:1083983. doi: 10.3389/fcell.2022.1083983 (PMC9755594; doi:10.3389/fcell.2022.1083983)
Supplement: Supplementary file 1 [file Table1.XLS]

## Sheet: Table S1goKegg
	ONTOLOGY	ID	Description	GeneRatio	BgRatio	pvalue	p.adjust	qvalue	geneID	Count	Type
GO:0062023	CC	GO:0062023	collagen-containing extracellular matrix	23/151	429/19594	2.47005e-13	6.61973e-11	6.11012e-11	ACAN/AEBP1/COL2A1/COL3A1/COL4A1/COL8A2/COL9A2/COL9A3/COMP/DPT/ECM2/EGFL7/F7/FCN2/GPC6/LOXL2/MGP/MMP28/SCARA3/SERPINA5/SERPING1/SMOC1/THBS4	23	GO
GO:0030198	BP	GO:0030198	extracellular matrix organization	18/149	307/18800	4.23844e-11	4.66875e-08	3.91797e-08	AEBP1/COL2A1/COL3A1/COL4A1/COL8A2/COL9A2/COL9A3/COMP/DPT/ECM2/FOXF1/HPN/IL6/KIF9/LOXL2/MMP28/RGCC/SMOC1	18	GO
GO:0043062	BP	GO:0043062	extracellular structure organization	18/149	308/18800	4.47151e-11	4.66875e-08	3.91797e-08	AEBP1/COL2A1/COL3A1/COL4A1/COL8A2/COL9A2/COL9A3/COMP/DPT/ECM2/FOXF1/HPN/IL6/KIF9/LOXL2/MMP28/RGCC/SMOC1	18	GO
GO:0045229	BP	GO:0045229	external encapsulating structure organization	18/149	310/18800	4.97381e-11	4.66875e-08	3.91797e-08	AEBP1/COL2A1/COL3A1/COL4A1/COL8A2/COL9A2/COL9A3/COMP/DPT/ECM2/FOXF1/HPN/IL6/KIF9/LOXL2/MMP28/RGCC/SMOC1	18	GO
GO:0005581	CC	GO:0005581	collagen trimer	9/151	86/19594	2.09324e-08	2.80494e-06	2.58901e-06	C1QTNF1/COL2A1/COL3A1/COL4A1/COL8A2/COL9A2/COL9A3/FCN2/SCARA3	9	GO
GO:0005201	MF	GO:0005201	extracellular matrix structural constituent	12/154	172/18410	2.28397e-08	8.61058e-06	7.6453e-06	ACAN/AEBP1/CHI3L1/COL2A1/COL3A1/COL4A1/COL8A2/COL9A2/COL9A3/COMP/DPT/MGP	12	GO
GO:0030020	MF	GO:0030020	extracellular matrix structural constituent conferring tensile strength	6/154	41/18410	1.0971e-06	0.000206803	0.00018362	COL2A1/COL3A1/COL4A1/COL8A2/COL9A2/COL9A3	6	GO
GO:0005604	CC	GO:0005604	basement membrane	7/151	95/19594	8.80118e-06	0.000786239	0.000725712	COL2A1/COL4A1/COL8A2/COL9A3/LOXL2/SMOC1/THBS4	7	GO
GO:0030199	BP	GO:0030199	collagen fibril organization	6/149	62/18800	9.5548e-06	0.00672658	0.00564487	AEBP1/COL2A1/COL3A1/COMP/DPT/LOXL2	6	GO
GO:0050900	BP	GO:0050900	leukocyte migration	13/149	384/18800	1.2e-05	0.00675842	0.00567159	ADORA1/ASB2/CXCL1/CXCL2/F7/HMOX1/IL6/JAML/MMP28/MTUS1/RIN3/S1PR1/THBS4	13	GO
GO:0030595	BP	GO:0030595	leukocyte chemotaxis	10/149	236/18800	1.91141e-05	0.00897089	0.00752827	CXCL1/CXCL2/F7/IL6/JAML/MMP28/MTUS1/RIN3/S1PR1/THBS4	10	GO
GO:0005788	CC	GO:0005788	endoplasmic reticulum lumen	11/151	311/19594	3.02039e-05	0.00202366	0.00186787	COL2A1/COL3A1/COL4A1/COL8A2/COL9A2/COL9A3/F7/IL6/SERPING1/STC2/TMEM132A	11	GO
GO:0060326	BP	GO:0060326	cell chemotaxis	11/149	315/18800	4.35093e-05	0.0175032	0.0146885	CXCL1/CXCL2/F7/IL6/JAML/MMP28/MTUS1/RIN3/S1PR1/THBS4/XCR1	11	GO
GO:0050673	BP	GO:0050673	epithelial cell proliferation	13/149	443/18800	5.30631e-05	0.018619	0.0156249	BMP6/COL8A2/EGFL7/EHF/GLUL/HMOX1/HPN/IL6/JAML/LOXL2/RGCC/THBS4/ZFP36	13	GO
GO:0048545	BP	GO:0048545	response to steroid hormone	11/149	330/18800	6.61356e-05	0.018619	0.0156249	ADM/ANXA3/BMP6/FOS/HEYL/IL6/NR1H3/PLPP1/TLR2/ZFP36/ZFP36L2	11	GO
GO:0032496	BP	GO:0032496	response to lipopolysaccharide	11/149	333/18800	7.17058e-05	0.018619	0.0156249	ADM/BMP6/CXCL1/CXCL2/FOS/IL6/NR1H3/SCIMP/TIMP4/TLR2/ZFP36	11	GO
GO:0002443	BP	GO:0002443	leukocyte mediated immunity	13/149	457/18800	7.27306e-05	0.018619	0.0156249	ANXA3/BATF/BST2/FOXF1/HLA-DRB1/HLA-DRB5/HMOX1/IL4I1/IL6/ITGAM/PRKCZ/SCIMP/SERPING1	13	GO
GO:0048407	MF	GO:0048407	platelet-derived growth factor binding	3/154	11/18410	9.01643e-05	0.0113307	0.0100604	COL2A1/COL3A1/COL4A1	3	GO
GO:0002274	BP	GO:0002274	myeloid leukocyte activation	9/149	232/18800	9.92734e-05	0.0195444	0.0164014	ANXA3/BATF/FOXF1/HMOX1/IL6/ITGAM/NR1H3/PLPP6/TLR2	9	GO
GO:0002703	BP	GO:0002703	regulation of leukocyte mediated immunity	9/149	236/18800	0.000113034	0.0195444	0.0164014	BST2/FOXF1/HLA-DRB1/HMOX1/IL4I1/IL6/ITGAM/PRKCZ/SCIMP	9	GO
GO:0002697	BP	GO:0002697	regulation of immune effector process	11/149	353/18800	0.000120176	0.0195444	0.0164014	BST2/FCN2/FOXF1/HLA-DRB1/HMOX1/IL4I1/IL6/ITGAM/PRKCZ/SCIMP/SERPING1	11	GO
GO:0051384	BP	GO:0051384	response to glucocorticoid	7/149	139/18800	0.000121597	0.0195444	0.0164014	ADM/ANXA3/BMP6/FOS/IL6/ZFP36/ZFP36L2	7	GO
GO:0002237	BP	GO:0002237	response to molecule of bacterial origin	11/149	354/18800	0.000123197	0.0195444	0.0164014	ADM/BMP6/CXCL1/CXCL2/FOS/IL6/NR1H3/SCIMP/TIMP4/TLR2/ZFP36	11	GO
GO:0060213	BP	GO:0060213	positive regulation of nuclear-transcribed mRNA poly(A) tail shortening	3/149	13/18800	0.000131642	0.0195444	0.0164014	BTG2/TOB1/ZFP36	3	GO
GO:0002683	BP	GO:0002683	negative regulation of immune system process	12/149	425/18800	0.000148781	0.0195444	0.0164014	ADORA1/BST2/COL3A1/FOXF1/HLA-DRB1/HMOX1/IL4I1/MAFB/MMP28/NR1H3/RIN3/SERPING1	12	GO
GO:0010817	BP	GO:0010817	regulation of hormone levels	13/149	496/18800	0.000164232	0.0195444	0.0164014	ADM/ADORA1/AKR1B1/BMP6/C1QTNF1/CYP26B1/DUOX1/GLUL/HLA-DRB1/HPN/IL4I1/IL6/STC2	13	GO
GO:0031100	BP	GO:0031100	animal organ regeneration	5/149	65/18800	0.000164705	0.0195444	0.0164014	ADM/ANXA3/F7/HMOX1/IL6	5	GO
GO:0035914	BP	GO:0035914	skeletal muscle cell differentiation	5/149	65/18800	0.000164705	0.0195444	0.0164014	ASB2/BTG2/CYP26B1/FOS/HEYL	5	GO
GO:0042446	BP	GO:0042446	hormone biosynthetic process	5/149	65/18800	0.000164705	0.0195444	0.0164014	ADM/AKR1B1/BMP6/DUOX1/STC2	5	GO
GO:0051216	BP	GO:0051216	cartilage development	8/149	195/18800	0.00016602	0.0195444	0.0164014	BMP6/CHI3L1/COL2A1/COL3A1/COMP/LOXL2/MGP/SOX5	8	GO
GO:0032352	BP	GO:0032352	positive regulation of hormone metabolic process	3/149	14/18800	0.000166572	0.0195444	0.0164014	ADM/BMP6/HPN	3	GO
GO:0032350	BP	GO:0032350	regulation of hormone metabolic process	4/149	36/18800	0.000183247	0.0206409	0.0173216	ADM/BMP6/HPN/STC2	4	GO
GO:0060211	BP	GO:0060211	regulation of nuclear-transcribed mRNA poly(A) tail shortening	3/149	15/18800	0.000207006	0.02159	0.0181181	BTG2/TOB1/ZFP36	3	GO
GO:1900153	BP	GO:1900153	positive regulation of nuclear-transcribed mRNA catabolic process, deadenylation-dependent decay	3/149	15/18800	0.000207006	0.02159	0.0181181	TOB1/ZFP36/ZFP36L2	3	GO
GO:0050878	BP	GO:0050878	regulation of body fluid levels	11/149	382/18800	0.00023846	0.0236713	0.0198647	ADM/ADORA1/AKR1B1/C1QTNF1/COL3A1/COMP/CYP26B1/F7/IL6/NR1H3/SERPING1	11	GO
GO:0002062	BP	GO:0002062	chondrocyte differentiation	6/149	110/18800	0.000243774	0.0236713	0.0198647	BMP6/COL2A1/COL3A1/COMP/LOXL2/SOX5	6	GO
GO:0031960	BP	GO:0031960	response to corticosteroid	7/149	157/18800	0.00025794	0.0241165	0.0202383	ADM/ANXA3/BMP6/FOS/IL6/ZFP36/ZFP36L2	7	GO
GO:0070482	BP	GO:0070482	response to oxygen levels	10/149	324/18800	0.000265487	0.0241165	0.0202383	ADM/ADORA1/F7/FOXO1/HMOX1/LOXL2/RGCC/STC2/SUV39H1/TLR2	10	GO
GO:0071222	BP	GO:0071222	cellular response to lipopolysaccharide	8/149	217/18800	0.000342537	0.029587	0.0248291	BMP6/CXCL1/CXCL2/IL6/NR1H3/SCIMP/TLR2/ZFP36	8	GO
GO:0005178	MF	GO:0005178	integrin binding	7/154	156/18410	0.000343866	0.0324094	0.0287762	COL3A1/COMP/ECM2/ICAM3/ITGAM/JAML/THBS4	7	GO
GO:0002685	BP	GO:0002685	regulation of leukocyte migration	8/149	218/18800	0.000353239	0.029587	0.0248291	ADORA1/F7/HMOX1/IL6/MMP28/MTUS1/RIN3/THBS4	8	GO
GO:0043434	BP	GO:0043434	response to peptide hormone	11/149	404/18800	0.000383774	0.029587	0.0248291	ADM/BTG2/COL3A1/F7/FOXO1/PRKCZ/SESN3/SOCS3/STC2/TIMP4/TLR2	11	GO
GO:0030282	BP	GO:0030282	bone mineralization	6/149	121/18800	0.000407373	0.029587	0.0248291	ANKH/BMP6/COMP/MGP/S1PR1/SLC24A3	6	GO
GO:0031214	BP	GO:0031214	biomineral tissue development	7/149	170/18800	0.000417722	0.029587	0.0248291	ANKH/BMP6/COMP/FAM83H/MGP/S1PR1/SLC24A3	7	GO
GO:0032332	BP	GO:0032332	positive regulation of chondrocyte differentiation	3/149	19/18800	0.00043072	0.029587	0.0248291	BMP6/LOXL2/SOX5	3	GO
GO:0009991	BP	GO:0009991	response to extracellular stimulus	12/149	479/18800	0.00044195	0.029587	0.0248291	ADM/CYP26B1/F7/FOS/FOXO1/GLUL/HMOX1/SESN3/SLC10A1/STC2/SUV39H1/ZFP36	12	GO
GO:0110148	BP	GO:0110148	biomineralization	7/149	172/18800	0.000448115	0.029587	0.0248291	ANKH/BMP6/COMP/FAM83H/MGP/S1PR1/SLC24A3	7	GO
GO:0030500	BP	GO:0030500	regulation of bone mineralization	5/149	81/18800	0.000461612	0.029587	0.0248291	ANKH/BMP6/COMP/MGP/S1PR1	5	GO
GO:0002688	BP	GO:0002688	regulation of leukocyte chemotaxis	6/149	124/18800	0.000464226	0.029587	0.0248291	F7/IL6/MMP28/MTUS1/RIN3/THBS4	6	GO
GO:0001666	BP	GO:0001666	response to hypoxia	9/149	286/18800	0.000469033	0.029587	0.0248291	ADM/ADORA1/F7/HMOX1/LOXL2/RGCC/STC2/SUV39H1/TLR2	9	GO
GO:0048705	BP	GO:0048705	skeletal system morphogenesis	8/149	228/18800	0.000476037	0.029587	0.0248291	BMP6/COL2A1/COL3A1/COMP/CSRNP1/CYP26B1/MGP/SOX5	8	GO
GO:0071219	BP	GO:0071219	cellular response to molecule of bacterial origin	8/149	229/18800	0.000490015	0.029587	0.0248291	BMP6/CXCL1/CXCL2/IL6/NR1H3/SCIMP/TLR2/ZFP36	8	GO
GO:0097529	BP	GO:0097529	myeloid leukocyte migration	8/149	229/18800	0.000490015	0.029587	0.0248291	CXCL1/CXCL2/IL6/JAML/MMP28/MTUS1/RIN3/THBS4	8	GO
GO:0001502	BP	GO:0001502	cartilage condensation	3/149	20/18800	0.000503794	0.029587	0.0248291	COL2A1/MGP/SOX5	3	GO
GO:0006700	BP	GO:0006700	C21-steroid hormone biosynthetic process	3/149	20/18800	0.000503794	0.029587	0.0248291	ADM/AKR1B1/BMP6	3	GO
GO:0042445	BP	GO:0042445	hormone metabolic process	8/149	230/18800	0.000504324	0.029587	0.0248291	ADM/AKR1B1/BMP6/CYP26B1/DUOX1/HPN/IL4I1/STC2	8	GO
GO:0050777	BP	GO:0050777	negative regulation of immune response	7/149	179/18800	0.000568675	0.0326814	0.0274259	COL3A1/FOXF1/HLA-DRB1/HMOX1/IL4I1/NR1H3/SERPING1	7	GO
GO:0045444	BP	GO:0045444	fat cell differentiation	8/149	237/18800	0.000614261	0.0342777	0.0287655	FABP3/FOXO1/IL6/KLF4/MAFB/RGS2/ZFP36/ZFP36L2	8	GO
GO:0098644	CC	GO:0098644	complex of collagen trimers	3/151	22/19594	0.000620486	0.033258	0.0306977	COL2A1/COL3A1/COL4A1	3	GO
GO:0050728	BP	GO:0050728	negative regulation of inflammatory response	7/149	182/18800	0.000627651	0.0342777	0.0287655	ADORA1/FOXF1/HLA-DRB1/KLF4/NR1H3/SOCS3/ZFP36	7	GO
GO:0032102	BP	GO:0032102	negative regulation of response to external stimulus	11/149	429/18800	0.00063297	0.0342777	0.0287655	ADORA1/C1QTNF1/FOXF1/HLA-DRB1/KLF4/MMP28/NR1H3/RIN3/SERPING1/SOCS3/ZFP36	11	GO
GO:0036293	BP	GO:0036293	response to decreased oxygen levels	9/149	299/18800	0.000645276	0.0342849	0.0287715	ADM/ADORA1/F7/HMOX1/LOXL2/RGCC/STC2/SUV39H1/TLR2	9	GO
GO:0046885	BP	GO:0046885	regulation of hormone biosynthetic process	3/149	22/18800	0.000672706	0.0350804	0.0294391	ADM/BMP6/STC2	3	GO
GO:0002686	BP	GO:0002686	negative regulation of leukocyte migration	4/149	52/18800	0.000763438	0.0386765	0.0324569	ADORA1/HMOX1/MMP28/RIN3	4	GO
GO:0098743	BP	GO:0098743	cell aggregation	3/149	23/18800	0.000769136	0.0386765	0.0324569	COL2A1/MGP/SOX5	3	GO
GO:0002699	BP	GO:0002699	positive regulation of immune effector process	8/149	248/18800	0.000825487	0.040782	0.0342238	FCN2/FOXF1/HLA-DRB1/HMOX1/IL6/ITGAM/PRKCZ/SCIMP	8	GO
GO:0031667	BP	GO:0031667	response to nutrient levels	11/149	446/18800	0.000870079	0.0422439	0.0354506	ADM/CYP26B1/F7/FOXO1/GLUL/HMOX1/SESN3/SLC10A1/STC2/SUV39H1/ZFP36	11	GO
GO:0071216	BP	GO:0071216	cellular response to biotic stimulus	8/149	256/18800	0.00101302	0.0483502	0.040575	BMP6/CXCL1/CXCL2/IL6/NR1H3/SCIMP/TLR2/ZFP36	8	GO
GO:0060350	BP	GO:0060350	endochondral bone morphogenesis	4/149	57/18800	0.00108034	0.0492274	0.0413111	BMP6/COL2A1/COL3A1/COMP	4	GO
GO:0002718	BP	GO:0002718	regulation of cytokine production involved in immune response	5/149	98/18800	0.0010988	0.0492274	0.0413111	BST2/HMOX1/IL6/PRKCZ/SCIMP	5	GO
GO:0060349	BP	GO:0060349	bone morphogenesis	5/149	98/18800	0.0010988	0.0492274	0.0413111	BMP6/COL2A1/COL3A1/COMP/CYP26B1	5	GO
GO:1900151	BP	GO:1900151	regulation of nuclear-transcribed mRNA catabolic process, deadenylation-dependent decay	3/149	26/18800	0.00110969	0.0492274	0.0413111	TOB1/ZFP36/ZFP36L2	3	GO
GO:0061448	BP	GO:0061448	connective tissue development	8/149	260/18800	0.0011188	0.0492274	0.0413111	BMP6/CHI3L1/COL2A1/COL3A1/COMP/LOXL2/MGP/SOX5	8	GO
hsa05146		hsa05146	Amoebiasis	8/83	102/8191	8e-06	0.00172097	0.00146609	COL3A1/COL4A1/CXCL1/CXCL2/IL6/ITGAM/PLCB4/TLR2	8	KEGG
hsa05323		hsa05323	Rheumatoid arthritis	7/83	93/8191	3.99e-05	0.00428551	0.00365082	CXCL1/CXCL2/FOS/HLA-DRB1/HLA-DRB5/IL6/TLR2	7	KEGG
hsa04512		hsa04512	ECM-receptor interaction	6/83	88/8191	0.000252013	0.0140866	0.0120003	COL2A1/COL4A1/COL9A2/COL9A3/COMP/THBS4	6	KEGG
hsa05134		hsa05134	Legionellosis	5/83	57/8191	0.000262076	0.0140866	0.0120003	CXCL1/CXCL2/IL6/ITGAM/TLR2	5	KEGG
hsa04933		hsa04933	AGE-RAGE signaling pathway in diabetic complications	6/83	100/8191	0.000503349	0.0211193	0.0179915	COL3A1/COL4A1/FOXO1/IL6/PLCB4/PRKCZ	6	KEGG
hsa04974		hsa04974	Protein digestion and absorption	6/83	103/8191	0.000589376	0.0211193	0.0179915	COL2A1/COL3A1/COL4A1/COL8A2/COL9A2/COL9A3	6	KEGG
hsa05140		hsa05140	Leishmaniasis	5/83	77/8191	0.00105585	0.0324296	0.0276267	FOS/HLA-DRB1/HLA-DRB5/ITGAM/TLR2	5	KEGG
hsa05144		hsa05144	Malaria	4/83	50/8191	0.00158391	0.0414138	0.0352803	COMP/IL6/THBS4/TLR2	4	KEGG
hsa04610		hsa04610	Complement and coagulation cascades	5/83	86/8191	0.0017336	0.0414138	0.0352803	CFD/F7/ITGAM/SERPINA5/SERPING1	5	KEGG
hsa05321		hsa05321	Inflammatory bowel disease	4/83	65/8191	0.00415158	0.0836202	0.0712358	HLA-DRB1/HLA-DRB5/IL6/TLR2	4	KEGG
hsa04145		hsa04145	Phagosome	6/83	152/8191	0.00431443	0.0836202	0.0712358	COMP/HLA-DRB1/HLA-DRB5/ITGAM/THBS4/TLR2	6	KEGG
hsa04931		hsa04931	Insulin resistance	5/83	108/8191	0.00466717	0.0836202	0.0712358	FOXO1/IL6/NR1H3/PRKCZ/SOCS3	5	KEGG
hsa04668		hsa04668	TNF signaling pathway	5/83	112/8191	0.00544341	0.0900256	0.0766925	CXCL1/CXCL2/FOS/IL6/SOCS3	5	KEGG
hsa05165		hsa05165	Human papillomavirus infection	9/83	331/8191	0.00608593	0.0934626	0.0796205	COL2A1/COL4A1/COL9A2/COL9A3/COMP/FOXO1/HEYL/PRKCZ/THBS4	9	KEGG
hsa05133		hsa05133	Pertussis	4/83	76/8191	0.00723434	0.103692	0.0883351	FOS/IL6/ITGAM/SERPING1	4	KEGG
hsa00533		hsa00533	Glycosaminoglycan biosynthesis - keratan sulfate	2/83	14/8191	0.00853049	0.109611	0.0933771	B3GNT7/CHST6	2	KEGG
hsa05332		hsa05332	Graft-versus-host disease	3/83	42/8191	0.00866689	0.109611	0.0933771	HLA-DRB1/HLA-DRB5/IL6	3	KEGG
hsa04151		hsa04151	PI3K-Akt signaling pathway	9/83	354/8191	0.00929729	0.110621	0.0942375	COL2A1/COL4A1/COL9A2/COL9A3/COMP/IL6/NTRK2/THBS4/TLR2	9	KEGG
hsa04926		hsa04926	Relaxin signaling pathway	5/83	129/8191	0.00977579	0.110621	0.0942375	COL3A1/COL4A1/FOS/PLCB4/PRKCZ	5	KEGG
hsa00910		hsa00910	Nitrogen metabolism	2/83	17/8191	0.0125007	0.134383	0.11448	CA1/GLUL	2	KEGG
hsa04672		hsa04672	Intestinal immune network for IgA production	3/83	49/8191	0.0132233	0.135381	0.115331	HLA-DRB1/HLA-DRB5/IL6	3	KEGG
hsa04657		hsa04657	IL-17 signaling pathway	4/83	94/8191	0.0149989	0.14417	0.122818	CXCL1/CXCL2/FOS/IL6	4	KEGG
hsa04510		hsa04510	Focal adhesion	6/83	201/8191	0.0160024	0.14417	0.122818	COL2A1/COL4A1/COL9A2/COL9A3/COMP/THBS4	6	KEGG
hsa05150		hsa05150	Staphylococcus aureus infection	4/83	96/8191	0.0160934	0.14417	0.122818	CFD/HLA-DRB1/HLA-DRB5/ITGAM	4	KEGG
hsa04640		hsa04640	Hematopoietic cell lineage	4/83	99/8191	0.0178276	0.152406	0.129834	HLA-DRB1/HLA-DRB5/IL6/ITGAM	4	KEGG
hsa04061		hsa04061	Viral protein interaction with cytokine and cytokine receptor	4/83	100/8191	0.0184305	0.152406	0.129834	CXCL1/CXCL2/IL6/XCR1	4	KEGG
hsa05142		hsa05142	Chagas disease	4/83	102/8191	0.0196742	0.156665	0.133463	FOS/IL6/PLCB4/TLR2	4	KEGG
hsa04514		hsa04514	Cell adhesion molecules	5/83	157/8191	0.0212825	0.159809	0.136141	HLA-DRB1/HLA-DRB5/ICAM3/ITGAM/LRRC4B	5	KEGG
hsa05417		hsa05417	Lipid and atherosclerosis	6/83	215/8191	0.0215556	0.159809	0.136141	CXCL1/CXCL2/FOS/IL6/PLCB4/TLR2	6	KEGG
hsa04659		hsa04659	Th17 cell differentiation	4/83	108/8191	0.0237125	0.169939	0.144771	FOS/HLA-DRB1/HLA-DRB5/IL6	4	KEGG
hsa04060		hsa04060	Cytokine-cytokine receptor interaction	7/83	295/8191	0.029522	0.204749	0.174425	BMP6/CXCL1/CXCL2/EDAR/IFNLR1/IL6/XCR1	7	KEGG
hsa04071		hsa04071	Sphingolipid signaling pathway	4/83	119/8191	0.0323434	0.217307	0.185123	ADORA1/PLCB4/PRKCZ/S1PR1	4	KEGG
hsa05152		hsa05152	Tuberculosis	5/83	180/8191	0.0355648	0.226733	0.193153	HLA-DRB1/HLA-DRB5/IL6/ITGAM/TLR2	5	KEGG
hsa01523		hsa01523	Antifolate resistance	2/83	30/8191	0.0367389	0.226733	0.193153	FOLR3/IL6	2	KEGG
hsa00562		hsa00562	Inositol phosphate metabolism	3/83	73/8191	0.0375781	0.226733	0.193153	ITPKA/PLCB4/PLCH2	3	KEGG
hsa00052		hsa00052	Galactose metabolism	2/83	31/8191	0.0390191	0.226733	0.193153	AKR1B1/GALM	2	KEGG
hsa05310		hsa05310	Asthma	2/83	31/8191	0.0390191	0.226733	0.193153	HLA-DRB1/HLA-DRB5	2	KEGG
hsa04918		hsa04918	Thyroid hormone synthesis	3/83	75/8191	0.0402202	0.227562	0.193859	DUOX1/GPX3/PLCB4	3	KEGG
hsa04062		hsa04062	Chemokine signaling pathway	5/83	192/8191	0.0449199	0.247635	0.21096	CXCL1/CXCL2/PLCB4/PRKCZ/XCR1	5	KEGG
hsa05167		hsa05167	Kaposi sarcoma-associated herpesvirus infection	5/83	194/8191	0.04661	0.250529	0.213425	CXCL1/CXCL2/FOS/IL6/ZFP36	5	KEGG
hsa05130		hsa05130	Pathogenic Escherichia coli infection	5/83	197/8191	0.0492159	0.258083	0.21986	CYFIP2/CYTH4/FOS/IL6/MYO5C	5	KEGG

## Sheet: Table S2-PPI
node1	node2
ACAN	COMP
ACAN	BMP6
ACAN	B3GNT7
ACAN	FCN2
ACAN	CHST6
ACAN	THBS4
ACAN	COL9A3
ACAN	COL9A2
ACAN	COL2A1
ACAN	PAX1
ACAN	IL6
ACAN	SOX5
ADM	CFD
ADM	IL6
ADORA1	NTRK2
ADORA1	FOS
ADORA1	IL6
AEBP1	COL3A1
AKR1B1	HMOX1
AKR1B1	GALM
AKR1B1	IL6
AKR1B1	CA1
ANKH	MGP
B3GNT7	CHST6
BATF	IL6
BATF	FOS
BATF	FOXO1
BMP6	EDAR
BMP6	IL6
BMP6	COL2A1
BST2	ITGAM
BTG2	CSRNP1
BTG2	ZFP36
BTG2	FOS
CFD	SERPING1
CFD	IL6
CHI3L1	COMP
CHI3L1	IL6
CHST6	COL8A2
CILP2	COMP
CILP2	CSRNP1
CILP2	THBS4
COL2A1	COMP
COL2A1	COL3A1
COL2A1	COL9A3
COL2A1	COL9A2
COL2A1	COL4A1
COL2A1	PAX1
COL2A1	SOX5
COL2A1	COL8A2
COL3A1	COMP
COL3A1	MGP
COL3A1	SERPING1
COL3A1	COL9A3
COL3A1	COL9A2
COL3A1	THBS4
COL3A1	IL6
COL3A1	DPT
COL3A1	COL8A2
COL3A1	LOXL2
COL3A1	COL4A1
COL4A1	THBS4
COL4A1	COL9A3
COL4A1	COL9A2
COL4A1	COL8A2
COL4A1	LOXL2
COL8A2	KRT7
COL8A2	COL9A3
COL8A2	COL9A2
COL9A2	COMP
COL9A2	THBS4
COL9A2	COL9A3
COL9A3	COMP
COL9A3	THBS4
COMP	IL6
CXCL1	HMOX1
CXCL1	TLR2
CXCL1	FOS
CXCL1	XCR1
CXCL1	SOCS3
CXCL1	ITGAM
CXCL1	CXCL2
CXCL1	IL6
CXCL2	HMOX1
CXCL2	TLR2
CXCL2	FOS
CXCL2	XCR1
CXCL2	SOCS3
CXCL2	IL6
CXCL2	ZFP36
CXCL2	ITGAM
CYBRD1	HMOX1
DPT	THBS4
DUOX1	HMOX1
DUOX1	TLR2
DUOX1	GPX3
DUOX1	IL6
F7	HPN
F7	IL6
FABP3	MYL3
FKBP2	SERPING1
FOS	HMOX1
FOS	ODC1
FOS	RGS2
FOS	TLR2
FOS	NTRK2
FOS	ITGAM
FOS	KLF4
FOS	SOCS3
FOS	ZFP36
FOS	MAFB
FOS	FOXO1
FOS	IL6
FOXF1	PAX1
FOXO1	HMOX1
FOXO1	S1PR1
FOXO1	SOCS3
FOXO1	KLF4
FOXO1	SESN3
FOXO1	IL6
GLUL	GPX3
GPX3	HMOX1
GPX3	IL6
HLA-DRB1	RIN3
HLA-DRB1	IL6
HLA-DRB1	ITGAM
HLA-DRB1	HLA-DRB5
HLA-DRB5	RIN3
HMOX1	ITGAM
HMOX1	TLR2
HMOX1	STC2
HMOX1	IL6
ICAM3	IL6
ICAM3	ITGAM
IFNLR1	IL6
IL6	TLR2
IL6	NTRK2
IL6	S1PR1
IL6	SOCS3
IL6	KLF4
IL6	NR1H3
IL6	ZFP36
IL6	ITGAM
ITGAM	TLR2
ITGAM	RNASE2
ITGAM	S1PR1
ITGAM	XCR1
ITGAM	SOCS3
ITGAM	KLF4
ITPKA	PLCB4
ITPKA	PLCH2
KCNMB4	UCHL1
KLF4	SOCS3
KLF4	MAFB
KRT7	KRT86
MGP	STC2
MMP28	TIMP4
NTRK2	UCHL1
PAX1	SOX5
PPAP2A	PPAPDC2
PRKCZ	TLR2
PRRX2	SOX5
RGS2	ZFP36
RGS2	S1PR1
RNASE2	TLR2
SOCS3	TLR2
SOCS3	ZFP36

## Sheet: Table S3 ceRNA axes
mRNA	inter_miRNA	mRNA
MAFB	hsa-miR-155-5p	FOS
MAFB	hsa-miR-155-5p	ZFP36
MAFB	hsa-miR-155-5p	NR1H3
MAFB	hsa-miR-155-5p	FHL1
MAFB	hsa-miR-155-5p	CYFIP2
FOS	hsa-miR-155-5p	CYFIP2
HMOX1	hsa-miR-148b-3p	SCARA3
BTG2	hsa-miR-185-5p	GALM
BTG2	hsa-miR-185-5p	EDAR
GLUL	hsa-miR-185-5p	SOCS3
GLUL	hsa-miR-185-5p	UNC5C
GLUL	hsa-miR-185-5p	GALM
GLUL	hsa-let-7f-5p	IFNLR1
GLUL	hsa-miR-196a-5p	DCAF15
GLUL	hsa-miR-196a-5p	LRRC4B
GLUL	hsa-let-7f-5p	FOXF1
MTUS1	hsa-miR-196a-5p	SOCS3
ZFP36	hsa-miR-155-5p	SOCS3
ZFP36	hsa-miR-155-5p	FHL1
ZFP36	hsa-miR-155-5p	CYFIP2
ZFP36	hsa-miR-155-5p	S1PR1
SOCS3	hsa-miR-155-5p	NR1H3
SOCS3	hsa-miR-155-5p	FHL1
SOCS3	hsa-let-7f-5p	KCNMB4
SOCS3	hsa-miR-302c-3p	CYP26B1
SOCS3	hsa-miR-155-5p	CYFIP2
SOCS3	hsa-miR-302c-3p	PRKCZ
SOCS3	hsa-let-7f-5p	FOXF1
NR1H3	hsa-miR-155-5p	FHL1
ANKH	hsa-miR-519d-3p	SCARA3
FHL1	hsa-miR-155-5p	CYFIP2
COL9A2	hsa-miR-664a-5p	IBA57
GTF2IRD2	hsa-miR-520c-3p	S1PR1
HEYL	hsa-miR-1827	IBA57
DCAF15	hsa-miR-196a-5p	LRRC4B
ZNF853	hsa-miR-10a-5p	SERTAD1

## Sheet: Table S4 Single cell mark gene
	p_val	avg_log2FC	pct.1	pct.2	p_val_adj	cluster	Genenames	Genenames	p_val	avg_log2FC	pct.1	pct.2	p_val_adj	cluster	gene	logFC.x	AveExpr.x	t.x	P.Value.x	adj.P.Val.x	B.x	logFC.y	AveExpr.y	t.y	P.Value.y	adj.P.Val.y	B.y
MT-ND3	0	1.03765	0.85	0.627	0	AFH	MT-ND3	COL2A1	4.209e-180	0.430658	0.843	0.577	6.99368e-176	NPH	COL2A1	2.89909	6.67917	20.2942	4.04455e-10	6.89963e-08	13.8808	6.48244	0.341569	8.4157	0.000632447	0.0178872	0.192539
SPTSSB	0	0.826933	0.589	0.23	0	AFH	SPTSSB	PAX1	1.72891e-284	0.592307	0.838	0.558	2.87276e-280	NPH	PAX1	1.83229	9.02483	4.03465	0.00193519	0.00761828	-2.13594	1.36072	4.76834	7.52009	0.00102122	0.0206593	-0.357256
FRZB	2.8643e-269	1.22642	0.716	0.402	4.75933e-265	AFH	FRZB	ZFP36L2	1.07643e-198	0.566936	0.557	0.298	1.78859e-194	NPH	ZFP36L2	1.33406	7.07353	5.8007	0.000115484	0.000872053	0.810196	1.19455	5.12625	6.27216	0.00217942	0.0282936	-1.23434
PAX1	1.27318e-264	0.649337	0.847	0.575	2.11551e-260	AFH	PAX1	COL2A1	1.24653e-214	0.977918	0.87	0.587	2.07124e-210	AFH	COL2A1	2.89909	6.67917	20.2942	4.04455e-10	6.89963e-08	13.8808	6.48244	0.341569	8.4157	0.000632447	0.0178872	0.192539
CRTAP	1.72133e-263	0.527522	0.869	0.611	2.86016e-259	AFH	CRTAP	PAX1	1.27318e-264	0.649337	0.847	0.575	2.11551e-260	AFH	PAX1	1.83229	9.02483	4.03465	0.00193519	0.00761828	-2.13594	1.36072	4.76834	7.52009	0.00102122	0.0206593	-0.357256
CAPS	9.36173e-262	0.740477	0.907	0.67	1.55555e-257	AFH	CAPS	SERPINA5	3.82167e-137	0.465781	0.678	0.457	6.35008e-133	AFH	SERPINA5	3.1163	5.15199	10.6086	3.80774e-07	1.12229e-05	6.84481	2.85086	2.41479	6.07606	0.00248317	0.0300921	-1.38588
ADIRF	2.62085e-251	0.718793	0.788	0.484	4.3548e-247	AFH	ADIRF	ZFP36L2	1.26424e-196	0.704643	0.58	0.309	2.10066e-192	AFH	ZFP36L2	1.33406	7.07353	5.8007	0.000115484	0.000872053	0.810196	1.19455	5.12625	6.27216	0.00217942	0.0282936	-1.23434
CLEC3A	3.98404e-246	0.806693	0.768	0.444	6.61988e-242	AFH	CLEC3A	COMP	1.86666e-297	0.927168	0.945	0.742	3.10165e-293	AFD	COMP	2.22291	9.93567	9.71681	9.23676e-07	2.15761e-05	5.91149	1.85022	6.29866	6.02579	0.00256906	0.0304819	-1.42539
MT-ND2	2.45824e-243	0.87355	0.806	0.601	4.08462e-239	AFH	MT-ND2
COL2A1	1.24653e-214	0.977918	0.87	0.587	2.07124e-210	AFH	COL2A1
ISLR	4.96244e-200	0.549617	0.679	0.394	8.24558e-196	AFH	ISLR
ZFP36L2	1.26424e-196	0.704643	0.58	0.309	2.10066e-192	AFH	ZFP36L2
CP	2.80555e-196	0.538124	0.839	0.604	4.6617e-192	AFH	CP
MT-ND1	1.29422e-178	0.643111	0.783	0.577	2.15048e-174	AFH	MT-ND1
SLC14A1	7.91895e-169	0.46424	0.555	0.306	1.31581e-164	AFH	SLC14A1
RHOBTB3	5.71488e-152	0.472841	0.753	0.528	9.49585e-148	AFH	RHOBTB3
SPARC	1.47052e-150	0.615197	0.756	0.508	2.44341e-146	AFH	SPARC
APOD	5.2128e-149	0.660023	0.525	0.294	8.6616e-145	AFH	APOD
TCF4	1.91368e-138	0.418668	0.615	0.384	3.17977e-134	AFH	TCF4
SERPINA5	3.82167e-137	0.465781	0.678	0.457	6.35008e-133	AFH	SERPINA5
GAS6	7.25466e-135	0.385166	0.56	0.332	1.20543e-130	AFH	GAS6
CITED2	6.48846e-124	0.448599	0.589	0.366	1.07812e-119	AFH	CITED2
ZBTB20	4.14408e-123	0.334263	0.505	0.291	6.88581e-119	AFH	ZBTB20
CD9	8.12483e-122	0.41267	0.663	0.45	1.35002e-117	AFH	CD9
PTRF	1.08269e-120	0.367358	0.657	0.439	1.79901e-116	AFH	PTRF
NFIA	2.71e-110	0.310425	0.51	0.302	4.50294e-106	AFH	NFIA
ITM2A	1.17909e-105	0.404843	0.665	0.459	1.95917e-101	AFH	ITM2A
CTGF	1.74806e-95	0.785207	0.588	0.387	2.90457e-91	AFH	CTGF
THY1	7.67481e-93	0.479419	0.573	0.372	1.27525e-88	AFH	THY1
CYR61	6.43282e-91	0.518112	0.561	0.36	1.06888e-86	AFH	CYR61
PLA2G2A	0	1.86149	0.697	0.295	0	AFD	PLA2G2A
CHI3L2	0	1.64778	0.877	0.472	0	AFD	CHI3L2
TGFBI	0	0.967943	0.697	0.323	0	AFD	TGFBI
PPP3CA	0	0.96419	0.914	0.69	0	AFD	PPP3CA
VEGFA	0	0.91979	0.781	0.502	0	AFD	VEGFA
COMP	1.86666e-297	0.927168	0.945	0.742	3.10165e-293	AFD	COMP
CA9	3.65865e-284	0.791495	0.588	0.283	6.07921e-280	AFD	CA9
PTGS2	8.63541e-275	0.75723	0.594	0.255	1.43486e-270	AFD	PTGS2
CTHRC1	2.9961e-270	0.721492	0.521	0.209	4.97832e-266	AFD	CTHRC1
DDIT4L	1.47125e-222	0.806113	0.79	0.551	2.44462e-218	AFD	DDIT4L
SPP1	7.12757e-199	0.360461	0.651	0.336	1.18432e-194	AFD	SPP1
ENO2	1.85066e-191	0.605991	0.625	0.384	3.07506e-187	AFD	ENO2
ERO1A	2.84547e-183	0.623359	0.694	0.47	4.72804e-179	AFD	ERO1A
NAMPT	5.99194e-171	0.527174	0.649	0.419	9.9562e-167	AFD	NAMPT
PRG4	1.93564e-155	0.294205	0.512	0.255	3.21625e-151	AFD	PRG4
IFRD1	1.47197e-143	0.499829	0.649	0.448	2.44583e-139	AFD	IFRD1
DDIT3	3.48645e-139	0.621301	0.656	0.443	5.79308e-135	AFD	DDIT3
HILPDA	1.44439e-121	0.540304	0.604	0.401	2.4e-117	AFD	HILPDA
SPTSSB1	0	1.04918	0.596	0.201	0	NPH	SPTSSB
CLEC3A1	0	1.03179	0.791	0.412	0	NPH	CLEC3A
ADIRF1	0	0.85156	0.795	0.46	0	NPH	ADIRF
CAPS1	0	0.815718	0.907	0.653	0	NPH	CAPS
PLAC9	0	0.699118	0.957	0.716	0	NPH	PLAC9
PAX11	1.72891e-284	0.592307	0.838	0.558	2.87276e-280	NPH	PAX1
ID3	2.96559e-244	0.641368	0.767	0.46	4.92762e-240	NPH	ID3
FRZB1	2.97531e-222	0.941433	0.673	0.396	4.94377e-218	NPH	FRZB
ISLR1	3.25139e-202	0.479119	0.656	0.383	5.40251e-198	NPH	ISLR
ZFP36L21	1.07643e-198	0.566936	0.557	0.298	1.78859e-194	NPH	ZFP36L2
CRTAP1	8.30084e-189	0.422076	0.82	0.611	1.37927e-184	NPH	CRTAP
COL2A11	4.209e-180	0.430658	0.843	0.577	6.99368e-176	NPH	COL2A1
CITED21	5.99204e-174	0.533173	0.593	0.349	9.95637e-170	NPH	CITED2
CXXC5	9.88905e-173	0.396701	0.517	0.276	1.64316e-168	NPH	CXXC5
RHOBTB31	6.22926e-156	0.415371	0.743	0.516	1.03505e-151	NPH	RHOBTB3
TCF41	2.68776e-155	0.412481	0.605	0.371	4.46598e-151	NPH	TCF4
ID1	1.8833e-153	0.603498	0.735	0.512	3.12928e-149	NPH	ID1
SPARC1	7.26606e-148	0.358726	0.757	0.49	1.20733e-143	NPH	SPARC
NFIA1	2.75939e-144	0.328887	0.512	0.287	4.585e-140	NPH	NFIA
PTMS	8.51562e-131	0.383477	0.791	0.591	1.41496e-126	NPH	PTMS
CD91	1.07624e-127	0.42378	0.644	0.442	1.78827e-123	NPH	CD9
THY11	4.46449e-127	0.500771	0.572	0.358	7.4182e-123	NPH	THY1
SLC14A11	1.79531e-126	0.334426	0.516	0.303	2.98309e-122	NPH	SLC14A1
ID4	5.25035e-119	0.405345	0.675	0.474	8.72398e-115	NPH	ID4
ITM2C	1.60179e-114	0.355871	0.682	0.478	2.66153e-110	NPH	ITM2C
PPIC	4.63972e-105	0.320778	0.613	0.408	7.70936e-101	NPH	PPIC
SPP11	0	2.36945	0.838	0.253	0	NPD	SPP1
PRG41	0	1.96078	0.636	0.197	0	NPD	PRG4
HMGA1	0	1.46181	0.726	0.254	0	NPD	HMGA1
UPP1	0	1.3868	0.759	0.239	0	NPD	UPP1
CD55	0	1.37737	0.841	0.467	0	NPD	CD55
CTSL	0	1.32157	0.809	0.472	0	NPD	CTSL
TM4SF1	0	1.2481	0.77	0.409	0	NPD	TM4SF1
IGFBP3	0	1.21737	0.603	0.208	0	NPD	IGFBP3
NRP2	0	1.12275	0.598	0.202	0	NPD	NRP2
C11orf96	0	1.1071	0.502	0.117	0	NPD	C11orf96
PTGS21	0	1.0293	0.645	0.219	0	NPD	PTGS2
SMOX	0	0.929651	0.542	0.232	0	NPD	SMOX
STK17A	0	0.922223	0.624	0.247	0	NPD	STK17A
WTAP	0	0.882202	0.867	0.593	0	NPD	WTAP
PMP22	0	0.84721	0.883	0.644	0	NPD	PMP22
VEGFA1	0	0.839746	0.832	0.47	0	NPD	VEGFA
GSTO1	0	0.833641	0.827	0.583	0	NPD	GSTO1
BZW1	0	0.829454	0.838	0.527	0	NPD	BZW1
SNHG12	0	0.79996	0.61	0.308	0	NPD	SNHG12
TNFRSF12A	0	0.778199	0.678	0.311	0	NPD	TNFRSF12A
RABGGTB	0	0.736886	0.791	0.548	0	NPD	RABGGTB
ERO1A1	0	0.711002	0.737	0.443	0	NPD	ERO1A
CCND1	0	0.695702	0.507	0.2	0	NPD	CCND1
SLC25A37	0	0.694827	0.899	0.672	0	NPD	SLC25A37
S100A2	2.09616e-288	1.0803	0.685	0.385	3.48298e-284	NPD	S100A2
NDRG1	3.09807e-271	0.709697	0.696	0.434	5.14775e-267	NPD	NDRG1
TIMP3	3.96374e-256	1.04016	0.681	0.437	6.58614e-252	NPD	TIMP3
ZNF593	9.54528e-253	0.566693	0.641	0.39	1.58604e-248	NPD	ZNF593
PLAUR	3.14263e-245	0.585936	0.521	0.25	5.22179e-241	NPD	PLAUR
CD44	2.41146e-218	0.503939	0.912	0.702	4.00688e-214	NPD	CD44
BHLHE40	2.48442e-216	0.749027	0.627	0.392	4.12811e-212	NPD	BHLHE40
PPP1R15A	2.36858e-214	0.571607	0.526	0.269	3.93564e-210	NPD	PPP1R15A
ISG20	1.58195e-208	0.596982	0.603	0.366	2.62857e-204	NPD	ISG20
ARF6	2.47365e-197	0.504686	0.702	0.484	4.11022e-193	NPD	ARF6
DDIT4L1	1.37675e-196	0.684059	0.77	0.546	2.28761e-192	NPD	DDIT4L
DNER	1.74153e-190	0.585651	0.602	0.381	2.89372e-186	NPD	DNER
GOLT1B	1.04544e-188	0.516781	0.537	0.31	1.73711e-184	NPD	GOLT1B
RNF145	1.67776e-178	0.566975	0.571	0.353	2.78776e-174	NPD	RNF145
NT5E	6.12606e-170	0.492614	0.526	0.301	1.01791e-165	NPD	NT5E
TGFBI1	4.66056e-161	0.692082	0.576	0.347	7.74399e-157	NPD	TGFBI
ENO21	5.26526e-148	0.409594	0.599	0.381	8.74876e-144	NPD	ENO2
